# Supplementary material for: Health Assessment of Electronic Waste Workers in Chile: Study Design and Participant Characterization
Source: Preprints.org preprint supplement (doi:10.20944/preprints201811.0446.v1), 2018-11-19
Supplement: Supplementary file 1 [file supplementary]

## **Supplemental tables**

Table S 1. Sociodemographic characteristics of the study population, by job type and site.

Table S 2. Work history and recycling activities, by job type and site.

Table S 3. Health characteristics of the study population, by job type and site.

Table S 4. Self-report of stress in the study population, by job type and site

Table S 5. Self-report noise exposure in the study population, by job type and site

Table S 6. Self-report injuries in the study population, by job type and site.

Table S 1. Sociodemographic characteristics of the study population, by job type and site

| Group                           | Informal           |                  | Formal                         |              |
|---------------------------------|--------------------|------------------|--------------------------------|--------------|
|                                 | Santiago<br>N = 53 | Temuco<br>N = 25 | Recycling<br>company<br>N = 15 | p-value      |
| <i>Demographic</i>              |                    |                  |                                |              |
| Sex (%male)                     | 72                 | 92               | 53                             | <b>0.021</b> |
| Age (mean)                      | 47                 | 52               | 39                             | <b>0.018</b> |
| Marital status (%)              |                    |                  |                                |              |
| - Married                       | 34                 | 60               | 53                             | 0.099        |
| - Single                        | 51                 | 20               | 33                             |              |
| - Living with partner           | 7.5                | 16               | 0                              |              |
| - Separated                     | 1.9                | 4                | 13                             |              |
| - Divorced                      | 3.8                | 0                | 0                              |              |
| - Widowed                       | 1.9                | 0                | 0                              |              |
| Family members* (mean)          | 3.8                | 3.8              | 3.5                            | 0.774        |
| Children under 21 years old (%) | 53                 | 44               | 40                             | 0.596        |
| Level of school (%)             |                    |                  |                                |              |
| - Medium                        | 34                 | 56               | 60                             | 0.336        |
| - Basic                         | 40                 | 24               | 20                             |              |
| - Superior                      | 17                 | 12               | 20                             |              |
| - None                          | 9.4                | 8                | 0                              |              |
| <i>Socioeconomic</i>            |                    |                  |                                |              |
| Main sources of income** (%)    |                    |                  |                                |              |
| - Electric or electronic waste  | 85                 | 80               | 80                             | 0.672        |
| - Other types of waste          | 55                 | 20               | 0                              | <b>0.000</b> |
| - Other                         | 23                 | 24               | 13                             | 0.178        |
| Monthly income† (%)             |                    |                  |                                |              |
| - Less than \$165               | 7.6                | 0                | 0                              | 0.527        |
| - \$167 - 495                   | 36                 | 24               | 20                             |              |
| - \$497 - 1,156                 | 36                 | 36               | 47                             |              |
| - \$1,156 - 1,651               | 7.5                | 32               | 20                             |              |
| - More than \$1,651             | 3.8                | 8                | 6.7                            |              |
| - Prefer not to answer          | 9.4                | 0                | 6.7                            |              |

\*Supported by household income †Parity of CLP\$ 606 per dollar at 04/04/18 \*\*There could be more than one source of income

Table S 2. Work history and recycling activities, by job type and site

| Group                                        | Informal           |                  | Formal                         | p-value      |
|----------------------------------------------|--------------------|------------------|--------------------------------|--------------|
|                                              | Santiago<br>N = 53 | Temuco<br>N = 25 | Recycling<br>company<br>N = 15 |              |
| Currently employed (%)                       | 94                 | 100              | 100                            | 0.310        |
| Currently involved in e-waste activities (%) | 99                 | 100              | 100                            | 0.683        |
| E-waste as main source of income (%)         | 52                 | 72               | 100                            | <b>0.002</b> |
| Current job(s)*                              |                    |                  |                                |              |
| - Electric or electronic waste recycling     | 68                 | 32               | 93                             | <b>0.000</b> |
| - Electronics collection                     | 50                 | 24               | 0                              | <b>0.001</b> |
| - Electronics repairer                       | 26                 | 60               | 0                              | <b>0.000</b> |
| - Scrap dealer                               | 40                 | 8                | 0                              | <b>0.001</b> |
| - Retired                                    | 7.5                | 4                | 0                              | 0.488        |
| - Other                                      | 32                 | 32               | 20                             | 0.648        |
| Role in e-waste recycling (%)                |                    |                  |                                |              |
| - Recyclers                                  | 55                 | 12               | 73                             | <b>0.000</b> |
| - Collectors                                 | 66                 | 16               | 0                              | <b>0.000</b> |
| - Repair shop                                | 26                 | 72               | 0                              | <b>0.000</b> |
| - Raw materials buyer                        | 11                 | 0                | 20                             | 0.097        |
| Years working with e-waste (mean)            | 14                 | 16               | 2.3                            | <b>0.001</b> |
| Hours of work per day (%)                    |                    |                  |                                |              |
| - Less than 5 hours                          | 5.8                | 4.0              | 0.0                            | 0.053        |
| - 5-8 hours                                  | 50                 | 64               | 93                             |              |
| - More than 8 hours                          | 44                 | 32               | 6.7                            |              |
| Work days per week (mean)                    | 5.7                | 5.9              | 5.8                            | 0.763        |

\*Multiple choices allowed

Table S 3. Health characteristics of the study population, by job type and site

| Group                                    | Informal           |                  | Formal                         | p-value      |
|------------------------------------------|--------------------|------------------|--------------------------------|--------------|
|                                          | Santiago<br>N = 53 | Temuco<br>N = 25 | Recycling<br>company<br>N = 15 |              |
| In general, your overall health is (%):  |                    |                  |                                |              |
| - Good                                   | 43                 | 52               | 60                             | 0.701        |
| - Fair                                   | 34                 | 32               | 27                             |              |
| - Very good                              | 9.4                | 12               | 13                             |              |
| - Poor                                   | 9.4                | 0                | 0                              |              |
| - Excellent                              | 3.8                | 4                | 0                              |              |
| <i>Self-reported health status</i>       |                    |                  |                                |              |
| Pregnant participants (%)                | 0                  | 0                | 6.7                            | <b>0.02</b>  |
| Past smoker* (%)                         | 47                 | 40               | 33                             | 0.595        |
| Current smoker (%)                       | 38                 | 24               | 20                             | 0.281        |
| Symptoms experienced in the last 2 weeks |                    |                  |                                |              |
| <i>- Skin rashes (%)</i>                 |                    |                  |                                |              |
| Rarely or never                          | 85                 | 80               | 87                             | 0.842        |
| Occasionally                             | 9.4                | 12               | 13                             |              |
| Always or frequently                     | 5.7                | 8                | 0                              |              |
| <i>- Headache or dizziness (%)</i>       |                    |                  |                                |              |
| Rarely or never                          | 47                 | 52               | 67                             | 0.674        |
| Occasionally                             | 38                 | 44               | 27                             |              |
| Always or frequently                     | 13                 | 4                | 6.7                            |              |
| <i>- Shaking or tremors (%)</i>          |                    |                  |                                |              |
| Rarely or never                          | 93                 | 92               | 100                            | 0.741        |
| Occasionally                             | 5.7                | 8                | 0                              |              |
| Always or frequently                     | 1.9                | 0                | 0                              |              |
| <i>- Blood in urine (%)</i>              |                    |                  |                                |              |
| Rarely or never                          | 94                 | 100              | 100                            |              |
| Occasionally                             | 3.8                | 0                | 0                              |              |
| Always or frequently                     | 1.9                | 0                | 0                              | 0.674        |
| <i>- Blood in stool (%)</i>              |                    |                  |                                |              |
| Rarely or never                          | 98                 | 96               | 100                            | 0.479        |
| Occasionally                             | 0                  | 4                | 0                              |              |
| Always or frequently                     | 1.9                | 0                | 0                              |              |
| <i>- Breathing problems (%)</i>          |                    |                  |                                |              |
| Rarely or never                          | 68                 | 84               | 87                             | 0.288        |
| Occasionally                             | 28                 | 12               | 6.7                            |              |
| Always or frequently                     | 3.8                | 4                | 6.7                            |              |
| <i>- Heart beating abnormally (%)</i>    |                    |                  |                                |              |
| Rarely or never                          | 55                 | 88               | 93                             | <b>0.008</b> |
| Occasionally                             | 40                 | 12               | 6.7                            |              |
| Always or frequently                     | 5.7                | 0                | 0                              |              |
| <i>- Loose or watery stools (%)</i>      |                    |                  |                                |              |
| Rarely or never                          | 83                 | 88               | 87                             | 0.408        |
| Occasionally                             | 15                 | 4                | 6.7                            |              |
| Always or frequently                     | 1.9                | 8                | 6.7                            |              |
| <i>- Fever (%)</i>                       |                    |                  |                                |              |
| Rarely or never                          | 89                 | 88               | 100                            | 0.625        |
| Occasionally                             | 9.4                | 12               | 0                              |              |
| Always or frequently                     | 1.9                | 0                | 0                              |              |
| <i>- Nausea or stomach ache (%)</i>      |                    |                  |                                |              |
| Rarely or never                          | 76                 | 76               | 80                             | 0.962        |
| Occasionally                             | 21                 | 20               | 13                             |              |

|                                                   |     |    |     |              |
|---------------------------------------------------|-----|----|-----|--------------|
| Always or frequently                              | 3.8 | 4  | 6.7 |              |
| Sought medical care or treatment <sup>†</sup> (%) | 34  | 20 | 27  | 0.632        |
| Type of medical care preferred (%)                |     |    |     |              |
| - Clinic/hospital                                 | 95  | 80 | 75  | 0.08         |
| - Traditional medicine                            | 0   | 20 | 0   |              |
| - N/A                                             | 5.3 | 0  | 0   |              |
| - Other                                           | 0   | 0  | 25  |              |
| Chronic diseases reported by participant (%)      |     |    |     |              |
| - NA/None of these                                | 42  | 56 | 73  | 0.076        |
| - High blood pressure                             | 26  | 32 | 13  | 0.421        |
| - Diabetes Mellitus                               | 15  | 20 | 0   | 0.197        |
| - Asthma                                          | 5.7 | 4  | 6.7 | 0.927        |
| - Heart disease                                   | 9.4 | 0  | 0   | 0.136        |
| - Stroke                                          | 3.8 | 4  | 6.7 | 0.885        |
| - Kidney disease                                  | 1.9 | 4  | 6.7 | 0.631        |
| - Liver disease                                   | 0   | 4  | 0   | 0.253        |
| - Other                                           | 30  | 8  | 0   | <b>0.008</b> |
| On medication for any of these (%)                | 65  | 55 | 75  | 0.735        |
| Health impairments/problems that limit work (%)   | 28  | 0  | 0   | <b>0.001</b> |
| Unintentional weight loss in the past year (%)    | 25  | 8  | 40  | 0.056        |

\*Have you smoked at least 100 cigarettes during your entire life?

<sup>†</sup>One participant answered "Don't know (2%)

Table S 4. Self-report of stress in the study population, by job type and site

| Group                                                          | Informal           |                  | Formal                         | p-value      |
|----------------------------------------------------------------|--------------------|------------------|--------------------------------|--------------|
|                                                                | Santiago<br>N = 53 | Temuco<br>N = 25 | Recycling<br>company<br>N = 15 |              |
| <i>Stressors</i>                                               |                    |                  |                                |              |
| Cohen's perceived stress scale                                 |                    |                  |                                |              |
| In the last month, how often have you felt:                    |                    |                  |                                |              |
| - Unable to control important things in life (%)               |                    |                  |                                |              |
| Never                                                          | 30                 | 40               | 60                             | 0.388        |
| Almost never                                                   | 23                 | 20               | 13                             |              |
| Sometimes                                                      | 32                 | 24               | 27                             |              |
| Fairly often                                                   | 13                 | 8                | 0                              |              |
| Very often                                                     | 1.9                | 8                | 0                              |              |
| - Confident about ability to handle problems (%)               |                    |                  |                                |              |
| Never                                                          | 5.7                | 0                | 0                              | 0.284        |
| Almost never                                                   | 5.7                | 8                | 0                              |              |
| Sometimes                                                      | 7.5                | 4                | 13                             |              |
| Fairly often                                                   | 51                 | 32               | 33                             |              |
| Very often                                                     | 30                 | 56               | 53                             |              |
| - Things were going your way (%)                               |                    |                  |                                |              |
| Never                                                          | 3.8                | 0                | 6.7                            | 0.301        |
| Almost never                                                   | 7.5                | 4                | 0                              |              |
| Sometimes                                                      | 40                 | 16               | 40                             |              |
| Fairly often                                                   | 42                 | 60               | 40                             |              |
| Very often                                                     | 7.5                | 20               | 13                             |              |
| - Couldn't overcome difficulties (%)                           |                    |                  |                                |              |
| Never                                                          | 28                 | 40               | 27                             | 0.619        |
| Almost never                                                   | 25                 | 32               | 33                             |              |
| Sometimes                                                      | 32                 | 24               | 40                             |              |
| Fairly often                                                   | 11                 | 4                | 0                              |              |
| Very often                                                     | 3.8                | 0                | 0                              |              |
| - Someone else decide work methods/pace/order (%)              |                    |                  |                                |              |
| Never/Almost never                                             | 83                 | 68               | 73                             | 0.359        |
| Occasionally                                                   | 11                 | 16               | 6.7                            |              |
| Always or frequently                                           | 5.7                | 16               | 20                             |              |
| - Experience violence or harassment at work (%)                |                    |                  |                                |              |
| Never/Almost never                                             | 85                 | 72               | 93                             | 0.066        |
| Occasionally                                                   | 9.4                | 24               | 0                              |              |
| Always or frequently                                           | 5.7                | 4                | 0                              |              |
| Prefer not to answer                                           | 0                  | 0                | 6.7                            |              |
| - Work interfere with family responsibilities/leisure time (%) |                    |                  |                                |              |
| Never/Almost never                                             | 60                 | 60               | 73                             | 0.88         |
| Occasionally                                                   | 26                 | 24               | 20                             |              |
| Always or frequently                                           | 13                 | 16               | 6.7                            |              |
| - Income not sufficient to support family (%)                  |                    |                  |                                |              |
| Never/Almost never                                             | 30                 | 64               | 40                             | <b>0.029</b> |
| Occasionally                                                   | 34                 | 16               | 47                             |              |
| Always or frequently                                           | 36                 | 20               | 13                             |              |

Table S 5. Self-report noise exposure in the study population, by job type and site

| Group                                                      | Informal           |                  | Formal                         |              |
|------------------------------------------------------------|--------------------|------------------|--------------------------------|--------------|
|                                                            | Santiago<br>N = 53 | Temuco<br>N = 25 | Recycling<br>company<br>N = 15 | p-value      |
| <i>Occupational noise exposure</i>                         |                    |                  |                                |              |
| Experienced difficulties hearing (%)                       | 23                 | 36               | 33                             | 0.414        |
| Time with difficulties hearing (%)                         |                    |                  |                                |              |
| - Since childhood                                          | 8.3                | 0                | 20                             | 0.548        |
| - Since adolescence                                        | 8.3                | 0                | 0                              |              |
| - Since adulthood                                          | 83                 | 100              | 80                             |              |
| Diagnosed with hearing loss (%)                            | 7.5                | 8                | 13                             | 0.774        |
| Exposed to loud noise at work (%)                          |                    |                  |                                |              |
| - Never                                                    | 23                 | 28               | 13                             | 0.088        |
| - Almost never                                             | 19                 | 24               | 6.7                            |              |
| - Sometimes                                                | 38                 | 12               | 20                             |              |
| - Fairly often                                             | 9.4                | 24               | 33                             |              |
| - Very often                                               | 11                 | 12               | 27                             |              |
| Years working in loud noise (mean)                         | 7.8                | 16               | 3.6                            | <b>0.004</b> |
| Experienced tinnitus after spending time in loud noise (%) |                    |                  |                                |              |
| - Never                                                    | 51                 | 60               | 40                             | 0.255        |
| - Almost never                                             | 11                 | 16               | 27                             |              |
| - Sometimes                                                | 32                 | 24               | 13                             |              |
| - Fairly often                                             | 3.8                | 0                | 13                             |              |
| - Very often                                               | 1.9                | 0                | 6.7                            |              |

Table S 6. Self-report injuries in the study population, by job type and site

| Group                                                                           | Informal           |                  | Formal                         | p-value      |
|---------------------------------------------------------------------------------|--------------------|------------------|--------------------------------|--------------|
|                                                                                 | Santiago<br>N = 53 | Temuco<br>N = 25 | Recycling<br>company<br>N = 15 |              |
| Injuries in e-waste recycling work in the past 6 months (mean)                  | 2.2                | 5.4              | 1.7                            | 0.131        |
| <i>For the worst injury during electric or electronic waste recycling work:</i> |                    |                  |                                |              |
| Activity at the time of injury (%)                                              |                    |                  |                                |              |
| - Dismantling electronic equipment                                              | 32                 | 36               | 27                             | 0.829        |
| - Sorting electronic waste                                                      | 13                 | 24               | 13                             | 0.457        |
| - Collecting electronic waste                                                   | 11                 | 4                | 6.7                            | 0.537        |
| - Removing covering of wires                                                    | 3.8                | 0                | 0                              | 0.462        |
| - Burning activities                                                            | 0                  | 0                | 0                              | -            |
| - Ash/wire collection after burning                                             | 0                  | 0                | 0                              | -            |
| - Other                                                                         | 23                 | 32               | 27                             | 0.676        |
| Body part(s) injured (%)                                                        |                    |                  |                                |              |
| - Hand                                                                          | 42                 | 48               | 6.7                            | <b>0.022</b> |
| - Lower leg                                                                     | 9.4                | 4                | 13                             | 0.564        |
| - Foot                                                                          | 11                 | 4                | 0                              | 0.251        |
| - Hip                                                                           | 3.8                | 4                | 6.7                            | 0.885        |
| - Other                                                                         | 11                 | 28               | 33                             | 0.072        |
| Type of injury (%)                                                              |                    |                  |                                |              |
| - Cuts/lacerations                                                              | 38                 | 28               | 13                             | 0.182        |
| - Contusions/abrasions                                                          | 13                 | 16               | 27                             | 0.457        |
| - Punctured wounds                                                              | 15                 | 0                | 0                              | <b>0.037</b> |
| - Sprains/strains                                                               | 1.9                | 8                | 6.7                            | 0.41         |
| - Burns/scalds                                                                  | 0                  | 12               | 0                              | <b>0.015</b> |
| - Fractures                                                                     | 1.9                | 0                | 0                              | 0.683        |
| - Other                                                                         | 13                 | 28               | 27                             | 0.224        |
| Medical care received (%)                                                       |                    |                  |                                |              |
| - Self-administered first aid                                                   | 60                 | 23               | 9.1                            | <b>0.007</b> |
| - No medical care                                                               | 19                 | 46               | 27                             |              |
| - Treatment at hospital/clinic                                                  | 11                 | 9.1              | 36                             |              |
| - Other                                                                         | 11                 | 23               | 27                             |              |
| Participants hospitalized (%)                                                   |                    |                  |                                |              |
| - Missed work (%)                                                               | 0.0                | 0.0              | 0.0                            | 0.636        |
| - Did not miss any work and worked regular job                                  | 81                 | 77               | 55                             | 0.07         |
| - Missed work                                                                   | 11                 | 23               | 46                             |              |
| - Did not miss any work and worked regular job                                  | 8.1                | 0                | 0                              |              |
| Missed work days (%)                                                            |                    |                  |                                |              |
| - Less than 1 day                                                               | 0                  | 20               | 0                              | 0.1          |
| - 1-5 days                                                                      | 0                  | 20               | 40                             |              |
| - 5-7 days                                                                      | 50                 | 0                | 20                             |              |
| - More than 7 days                                                              | 50                 | 0                | 0                              |              |
| - Does not apply                                                                | 0                  | 60               | 40                             |              |
| Tools/parts of work that lead to more frequent injuries (%)                     |                    |                  |                                |              |
| - Yes                                                                           | 70                 | 56               | 27                             | <b>0.031</b> |
| - Unsure                                                                        | 1.9                | 0                | 0                              |              |
| Job task that you have experienced more injuries when performing it (%)         |                    |                  |                                |              |
| - Yes                                                                           | 55                 | 56               | 40                             | 0.417        |
| - Unsure                                                                        | 5.7                | 0                | 0                              |              |
| Instructions/training prior to injury (%)                                       |                    |                  |                                |              |



|                                                                    |     |     |     |               |
|--------------------------------------------------------------------|-----|-----|-----|---------------|
| - Yes                                                              | 22  | 14  | 9.1 | 0.51          |
| - Don't know                                                       | 5.4 | 0   | 0   |               |
| Use of safety equipment at work (%)                                |     |     |     |               |
| - Leather/rubber gloves                                            | 60  | 32  | 87  | <b>0.002</b>  |
| - Rubber-soled boots or shoes                                      | 32  | 60  | 93  | <b>0</b>      |
| - Safety glasses/face shields/eye protection                       | 40  | 36  | 20  | 0.373         |
| - Dust mask                                                        | 15  | 16  | 20  | 0.901         |
| - Latex/plastic gloves                                             | 11  | 20  | 0   | 0.163         |
| - Earplugs or earmuffs                                             | 7.5 | 8   | 13  | 0.774         |
| - Other                                                            | 19  | 16  | 27  | 0.704         |
| Pain in hands or wrists after working with e-waste (%)             |     |     |     |               |
| - Yes                                                              | 51  | 44  | 60  | 0.778         |
| - Unsure                                                           | 1.9 | 0   | 0   |               |
| Intensity of pain (mean)                                           | 5   | 4.9 | 47  | 0.913         |
| Muscle soreness in your body from sitting in the same position (%) |     |     |     |               |
| - Yes                                                              | 68  | 48  | 60  | 0.26          |
| - Unsure                                                           | 3.8 | 0   | 0   |               |
| Intensity of muscle soreness (mean)                                | 5.4 | 4.8 | 3.4 | <b>0.0446</b> |
